# Supplementary material for: Kdm3a lysine demethylase is an Hsp90 client required for cytoskeletal rearrangements during spermatogenesis
Source: PubMed Central journal article supplement — Mol Biol Cell. 2014 Apr 15;25(8):1216–33. doi: 10.1091/mbc.E13-08-0471 (PMC3982988; doi:10.1091/mbc.e13-08-0471), 2014-04-15

# Supplemental Materials

*Molecular Biology of the Cell*

Kasioulis et al.

**Supplemental Figure 1: Nuclear and cytoplasmic distribution of Tagged Kdm3a isoforms**

(A) Summary diagram illustrating the position of GFP and RFP tags for each construct. FL: full length, i2: newly identified isoform 2. (B) Full length Kdm3a can be exclusively nuclear (Nu) or both nuclear-cytoplasmic (Nu/Cyt). GFP tagged isoform 2 is mostly nuclear and cytoplasmic. Few cells present strong nuclear staining (arrow). The subcellular distribution of Kdm3a isoforms is not affected by the position of the Tag (not shown). (C) The relative abundance of overexpressed Kdm3a isoforms in each subcellular compartment was quantified by a script that would automatically segment the nuclear area of a given cell based on its DAPI staining followed by quantification of H3K9me2 (FITC) and TxRd (RFP) staining intensities in the segmented nucleus and manually defined cytoplasmic area seen in the merged image. The results of RFP distribution before and after Hsp90 inhibition are shown in Figure 6F.

**Supplemental Figure 2: Protein loadings and analysis.**

(A) TrueBlue™ stain of 9 aliquots (1-17) from testes sucrose gradients to evaluate fractionation pattern of samples and loadings. Input is the cytoplasmic extract used for each gradient. (B) Membranes were simultaneously blotted with Hsp90ab1 and  $\gamma$ -tubulin. A long exposure illustrate how only  $\gamma$ -tubulin is found in soluble fractions in *Kdm3a* <sup>$\Delta$ JC/ $\Delta$ JC</sup>. (C) X-ray shown in Figure 8 were superimposed and scanned and the indicated areas (yellow rectangles) were measured for  $\gamma$  tubulin profile plots by ImageJ (Figure 8C) Hsp90ab1 and Cct3 (Supplemental Figure 2D). Exposure times between genotypes are equal. The sum of intensities across the indicated fractions is considered 100%. The numbers over the indicated fractions illustrate the disproportionately low presence of Hsp90ab1 in the fourth fraction of homozygous gradients. (D) Illustrate the relative distribution of the indicated Hsp90ab1 and Cct3 across 5 fractions of WT and *Kdm3a* <sup>$\Delta$ JC/ $\Delta$ JC</sup> extracts. A and B, point to the difference between WT and *Kdm3a* <sup>$\Delta$ JC/ $\Delta$ JC</sup> gradients for Cct3 and Hsp90ab1 respectively.

**Supplemental Figure 3: A second antibody to the C-terminal end of Kdm3a validates its cytoplasmic fractionation.**

(A) Discontinuous sucrose gradients of cytoplasmic wild type testes blotted with the indicated antibodies confirms Kdm3a complexed state beyond fraction 7 and its partial overlap with Cct and Hsp90 chaperones. Input is the cytoplasmic extract used for this gradient were microtubules were destabilised to reduce indirect effects. (B) Trueblue™ stain illustrates protein distribution along the early fractions of the gradient.

**Supplemental Figure 4: Chaperone complexes in somatic cells with destabilized microtubules**

(A) Membranes were simultaneously blotted with Hsp90ab1 and Cct3. As cells were treated with Nocodazole and cytochalasin D,  $\gamma$ -tubulin is present in early fractions only. (B) Quantitation of each of these bands along the gradient shows their relative partition in wild type and *Kdm3a* <sup>$\Delta$ JC/ $\Delta$ JC</sup> cells. Note altered fractionation of Hsp90ab1 and Tubulin between wild type and homozygous gradients (black line). (C) TrueBlue™ stain of 10 aliquots (1-19) from this gradient illustrates the identical distribution of bulk proteins, indicating that the difference shown in B is specific to these two proteins.

**Supplemental Figure 5: Mass-spectrometric evidence for the PTM state of proteins from *Kdm3a* <sup>$\Delta$ JC/ $\Delta$ JC</sup> testes.**

(A) The single band shown in Figure 8 D was cut and digested in gel. Fragment ions of Actbl2 identified from *Kdm3a* <sup>$\Delta$ JC/ $\Delta$ JC</sup> testes with a pool of antibodies to mono, di and tri-methylated lysines. (B) Total Hsp90 pull-downs from each genotype were digested on beads. Actbl2 peptides found this way from *Kdm3a* <sup>$\Delta$ JC/ $\Delta$ JC</sup> extracts (yellow). Modified peptide found in A was not found in this analysis (red box). (C) Fragment ions for Cct2 found in Hsp90 purified complexes from *Kdm3a* <sup>$\Delta$ JC/ $\Delta$ JC</sup> testes using Scaffold 4(v4.2.1) support lysine methylation.

**Supplemental Figure 6: Hsp90 interaction with another JmjC containing protein.**

(A) Positive clones identified from a large two-hybrid screen using Hsp90 as baits were purified, re-

transformed into yeast and mated to re-assess interactions. The catalytic domain of Kdm6a interacts with Hsp90aa1. Diagram illustrates JmjC regions contained in two-hybrid and GST constructs. (B) Bacterially expressed catalytic domain of JmjC proteins identified in the two-hybrid screens were expressed in GST vectors and incubated with mammalian cell extracts. Proteins bound to glutathione beads were resolved and blotted with the indicated antibodies to determine interactions of GST constructs with Hsp90.

**Supplemental Table 2:** Hsp90 pull downs of total testes extracts. The table displays exclusive unique spectrum counts of proteins absent in WT, *Kdm3a*<sup>ΔJC/-</sup> and *Kdm3a*<sup>ΔJC/ΔJC</sup> controls.

**Supplemental Table 3:** Cct chaperonins in Hsp90 pull downs of total testes extracts. The table displays exclusive unique spectrum counts of Cct/Tcp proteins in all samples including controls. Subtractions of the spectral number found in each respective control suggest an enrichment of Cct spectral counts in *Kdm3a*<sup>ΔJC/ΔJC</sup> samples (boxed counts).

**Supplemental Table 4:** Potentially methylated peptides found in *Kdm3a*<sup>ΔJC/ΔJC</sup> only. The table displays exclusive unique modified spectrum counts.

**Supplemental Figure 1:**

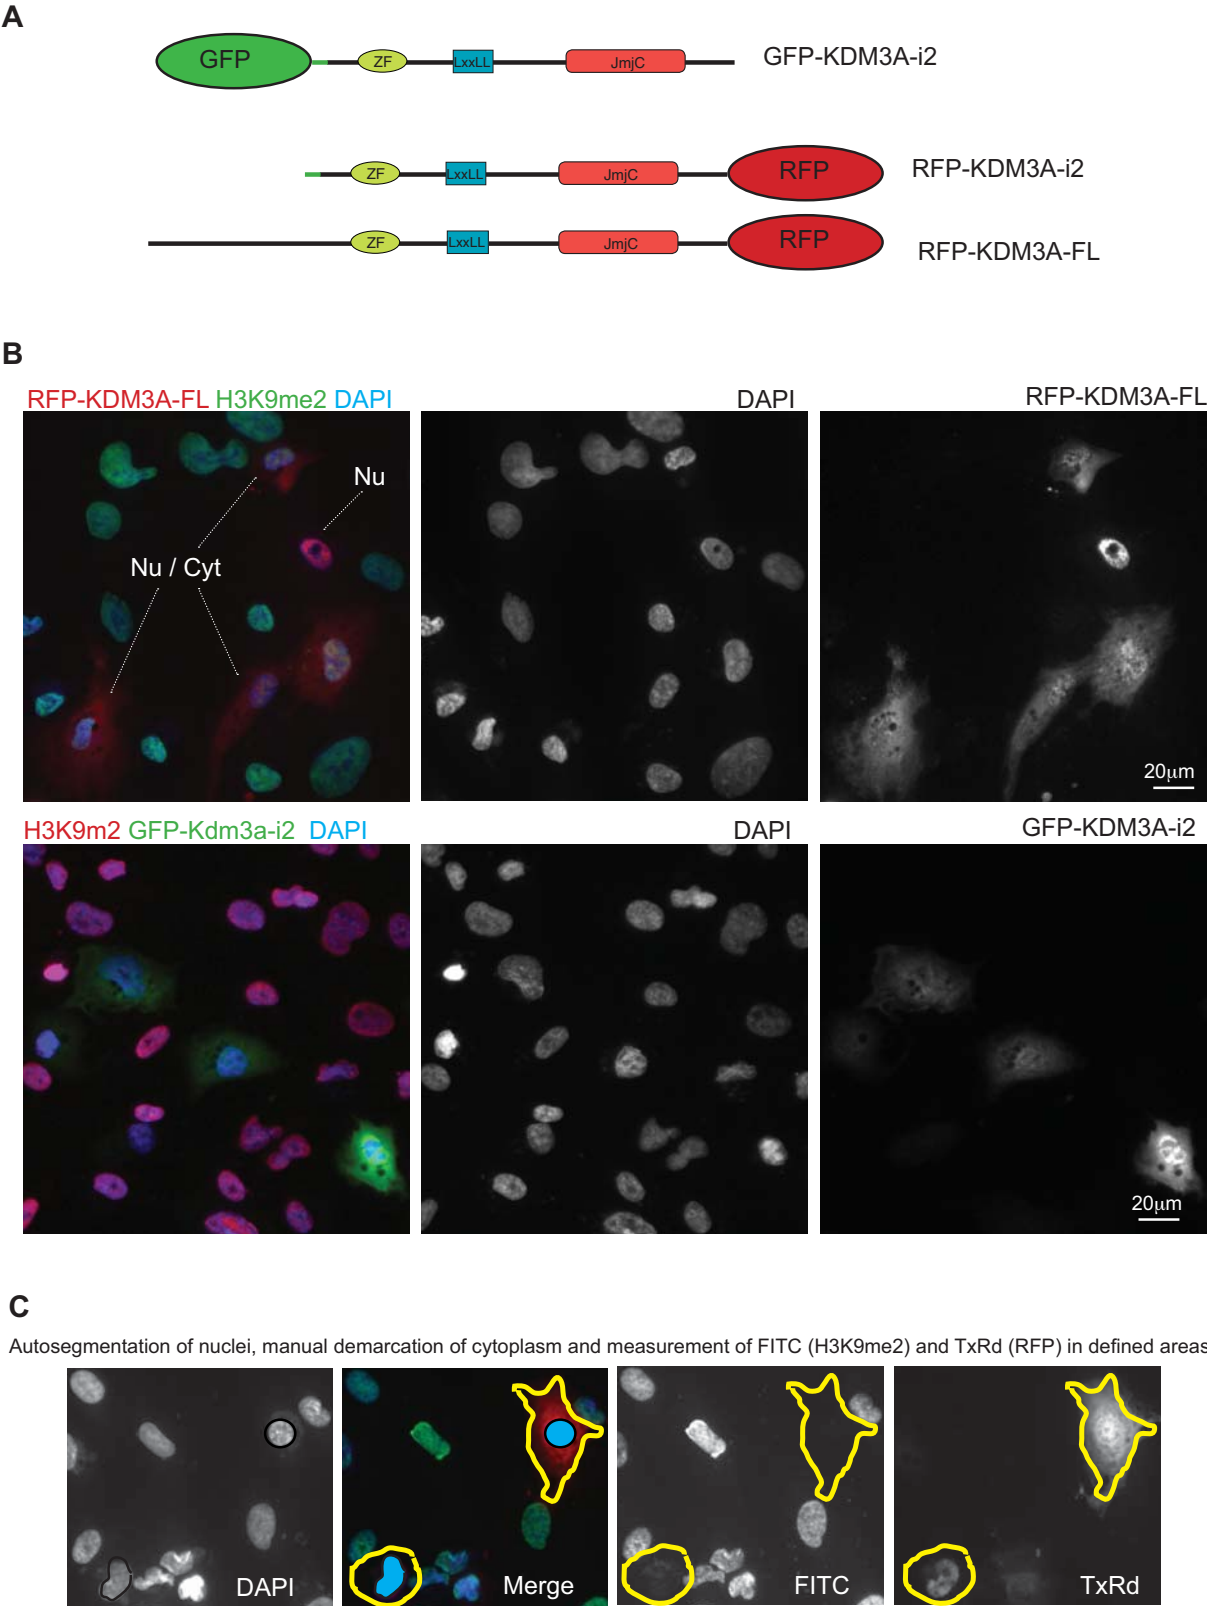

**Supplemental Figure 2:**

**A**

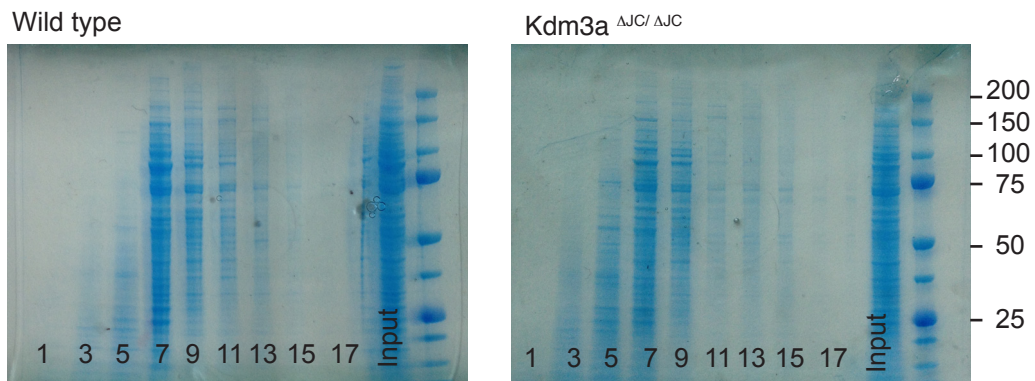

**B**

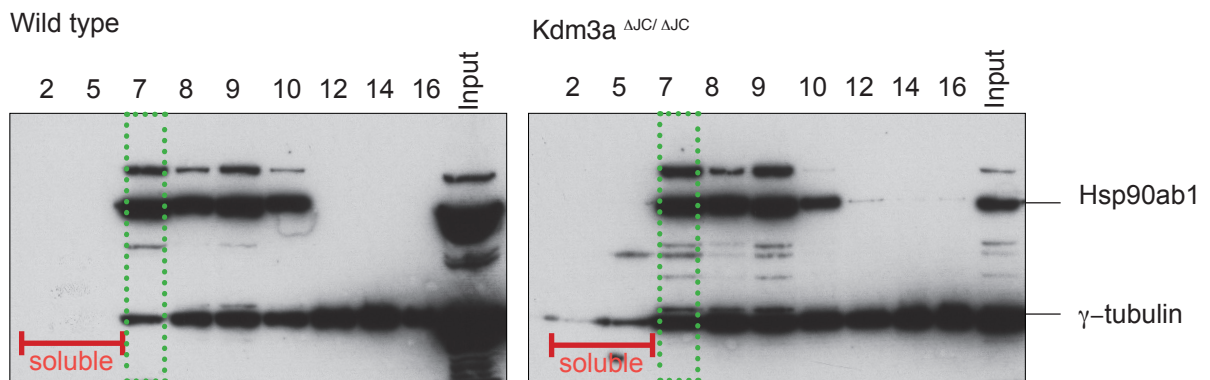

IB:  $\gamma$ -tubulin and Hsp90ab1 (Long exposure)

**C**

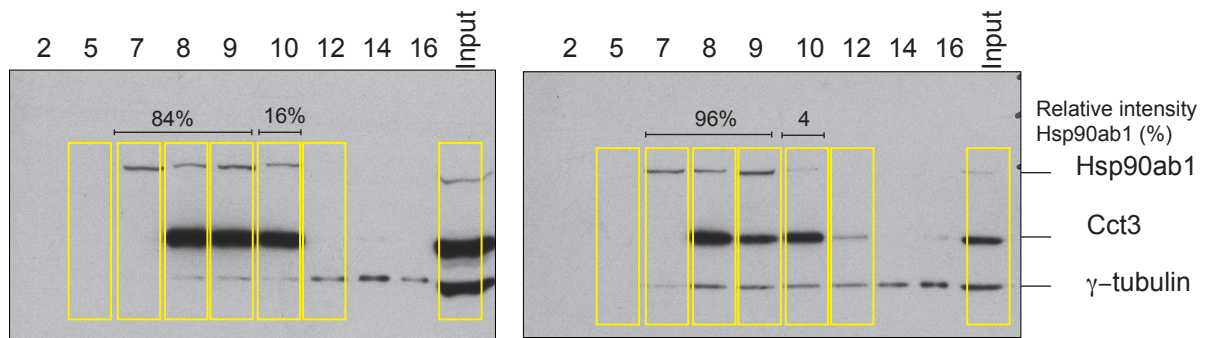

Superimposed images of Hsp90ab1, Cct3,  $\gamma$ -tubulin used for plot profile

**D**

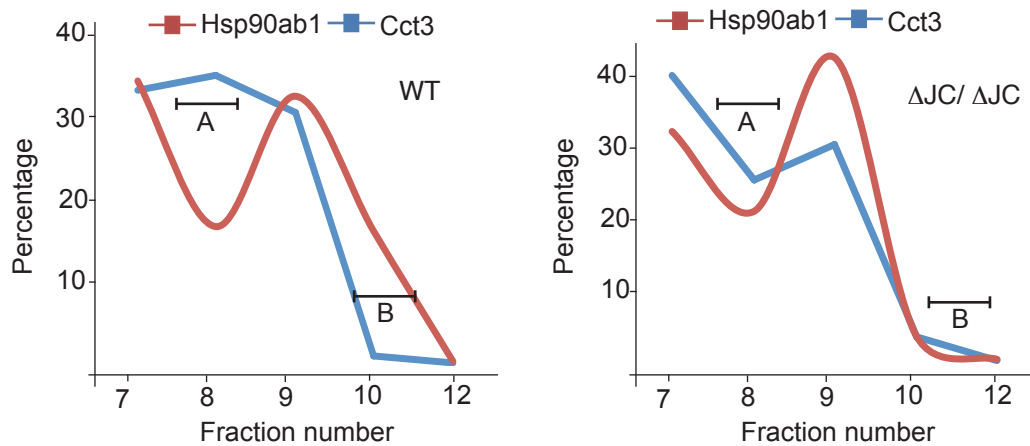

### Supplemental Figure 3:

Cytoplasmic gradients of Wild type adult testes (Cytochalasin B + Nocodazole)

**A**

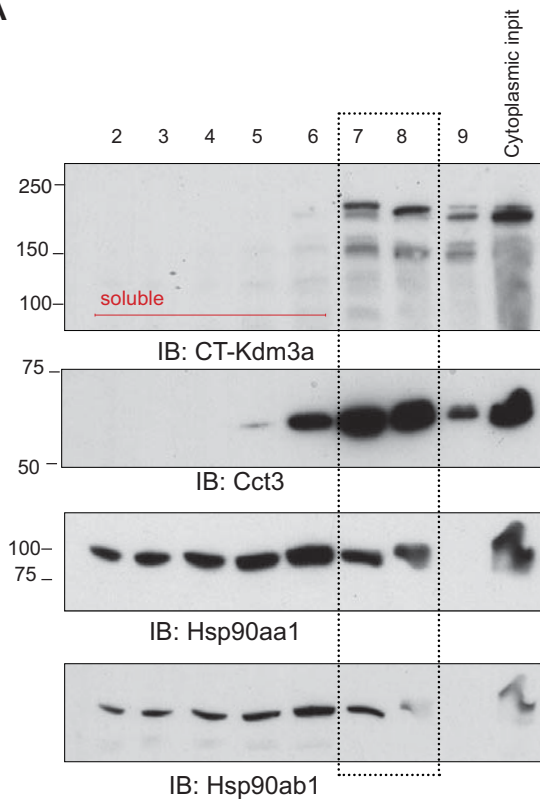

**B**

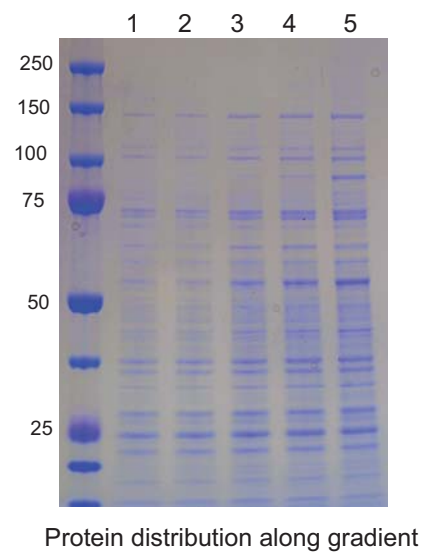

**Supplemental Figure 4:**

**A**

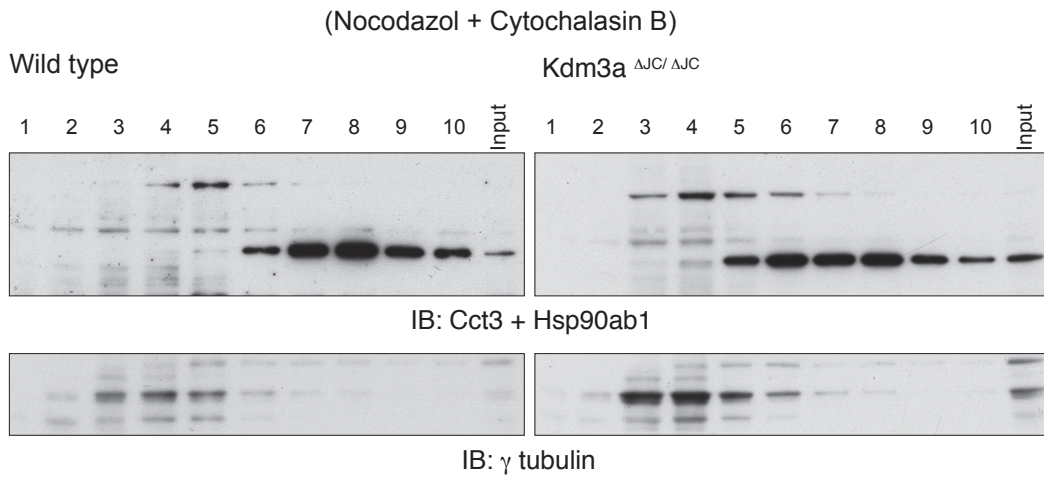

**B**

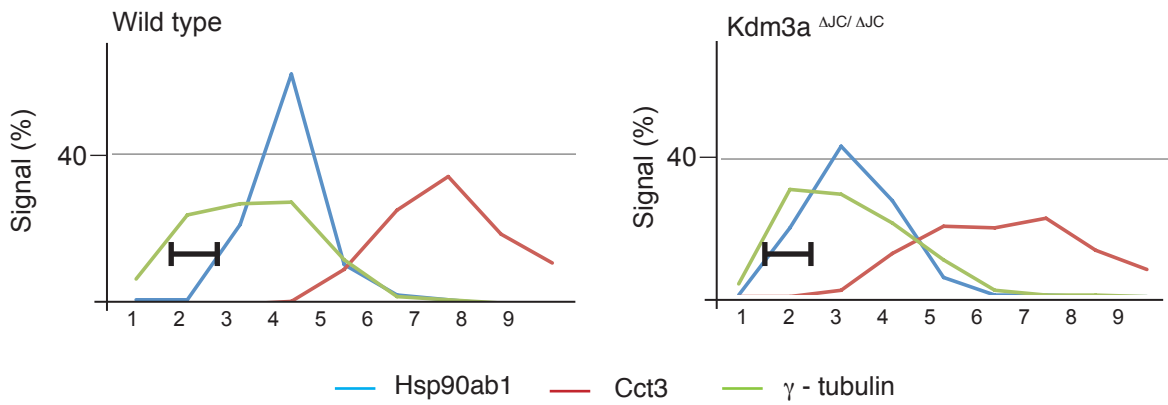

**C**

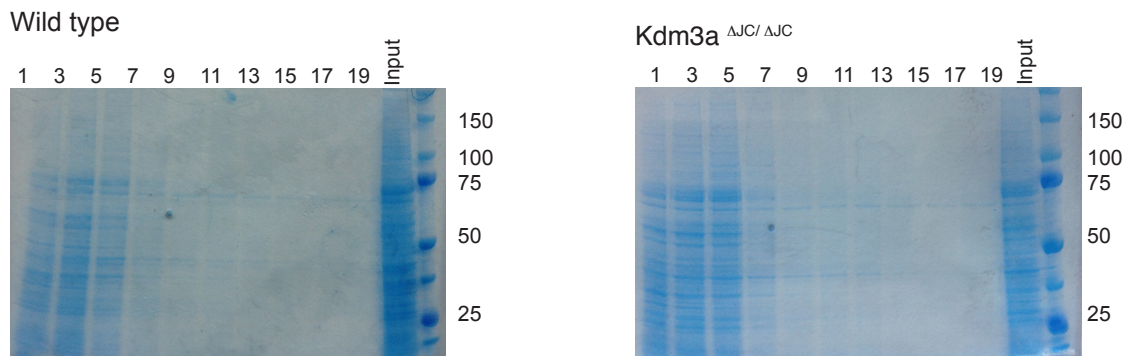

# Supplemental Figure 5:

A

## Fragment ions for Actb12 di-methylated peptide (Mascot display)

Monoisotopic mass of neutral peptide Mr(calc): 1591.8313  
 Fixed modifications: Carbamidomethyl (C) (apply to specified residues or termini only)  
 Variable modifications:  
 K3 : Dimethyl (K)  
 M13 : Oxidation (M), with neutral losses 63.9983 (shown in table), 0.0000  
 Ions Score: 27 Expect: 0.069  
 Matches : 32/220 Fragment ions using 69 most intense peaks (help)

| #  | b         | b <sup>++</sup> | b <sup>+</sup> | b <sup>++</sup> | b <sup>0</sup> | b <sup>0++</sup> | Seq | y         | y <sup>++</sup> | y <sup>+</sup> | y <sup>++</sup> | y <sup>0</sup> | y <sup>0++</sup> | #  |
|----|-----------|-----------------|----------------|-----------------|----------------|------------------|-----|-----------|-----------------|----------------|-----------------|----------------|------------------|----|
| 1  | 132.0478  | 66.5275         |                |                 |                |                  | M   |           |                 |                |                 |                |                  | 14 |
| 2  | 260.1063  | 130.5568        | 243.0798       | 122.0435        |                |                  | Q   | 1397.7999 | 699.4036        | 1380.7733      | 690.8903        | 1379.7893      | 690.3983         | 13 |
| 3  | 416.2326  | 208.6199        | 399.2061       | 200.1067        |                |                  | K   | 1269.7413 | 635.3743        | 1252.7147      | 626.8610        | 1251.7307      | 626.3690         | 12 |
| 4  | 545.2752  | 273.1412        | 528.2486       | 264.6280        | 527.2646       | 264.1360         | E   | 1113.6150 | 557.3111        | 1096.5885      | 548.7979        | 1095.6045      | 548.3059         | 11 |
| 5  | 658.3593  | 329.6833        | 641.3327       | 321.1700        | 640.3487       | 320.6780         | I   | 984.5724  | 492.7899        | 967.5459       | 484.2766        | 966.5619       | 483.7846         | 10 |
| 6  | 759.4069  | 380.2071        | 742.3804       | 371.6938        | 741.3964       | 371.2018         | T   | 871.4884  | 436.2478        | 854.4618       | 427.7345        | 853.4778       | 427.2425         | 9  |
| 7  | 830.4441  | 415.7257        | 813.4175       | 407.2124        | 812.4335       | 406.7204         | A   | 770.4407  | 385.7240        | 753.4141       | 377.2107        | 752.4301       | 376.7187         | 8  |
| 8  | 943.5281  | 472.2677        | 926.5016       | 463.7544        | 925.5176       | 463.2624         | L   | 699.4036  | 350.2054        | 682.3770       | 341.6921        | 681.3930       | 341.2001         | 7  |
| 9  | 1014.5652 | 507.7863        | 997.5387       | 499.2730        | 996.5547       | 498.7810         | A   | 586.3195  | 293.6634        | 569.2930       | 285.1501        | 568.3089       | 284.6581         | 6  |
| 10 | 1111.6180 | 556.3126        | 1094.5914      | 547.7994        | 1093.6074      | 547.3074         | P   | 515.2824  | 258.1448        | 498.2558       | 249.6316        | 497.2718       | 249.1396         | 5  |
| 11 | 1198.6500 | 599.8286        | 1181.6235      | 591.3154        | 1180.6395      | 590.8234         | S   | 418.2296  | 209.6185        | 401.2031       | 201.1052        | 400.2191       | 200.6132         | 4  |
| 12 | 1299.6977 | 650.3525        | 1282.6712      | 641.8392        | 1281.6871      | 641.3472         | T   | 331.1976  | 166.1024        | 314.1710       | 157.5892        | 313.1870       | 157.0972         | 3  |
| 13 | 1382.7348 | 691.8710        | 1365.7083      | 683.3578        | 1364.7243      | 682.8658         | M   | 230.1499  | 115.5786        | 213.1234       | 107.0653        |                |                  | 2  |
| 14 |           |                 |                |                 |                |                  | K   | 147.1128  | 74.0600         | 130.0863       | 65.5468         |                |                  | 1  |

B

ACTBL\_MOUSE (100%), 42,005.1 Da  
 Beta-actin-like protein 2 OS=Mus musculus GN=Actb12 PE=1 SV=1  
 2 exclusive unique peptides, 3 exclusive unique spectra, 4 total spectra, 108/376 amino acids (29% coverage)

MVDDDELTAALV YDNGSGMCKA GFGGDDAPRA VFPMSMVGRRP HGGVMVGMGQ KDCYVGDEAQ SKRGIILTLKY  
 PIEHGVVFNW DDMKEIWXHT FYNELRVAPD EHPILLTEAP LNPKINREKM TQIMFEAFNT PAMYVAIQAV  
 LSLYASGR T T GIVMDSGDGV THTVPIEGY ALPHAILRLD LAGRDLDYDL MKIILTERGYN FTTAREIIV  
 RDVKEKLCYV ALDFEQEMVT AAASSSLERS Y YELPDGQVIT I GNERFERCPE AIFQPSFLGI ESRGIHETTF  
 NSIMKCDVDI RKDLFANTVVL SGGSTMYPGI ADRLMQKEIVT LAPSTMKIKI I LAPPERKYSV WIGGSILASL  
 STFQQMWISK QEYDEAGPPI VHRKCF

C

## Fragment ions for Cct2 mono-methylated peptide (Scaffold™ display)

| B  | B Ions  | B+2H  | B-NH3   | B-H2O   | AA   | Y Ions  | Y+2H  | Y-NH3   | Y-H2O   | Y  |
|----|---------|-------|---------|---------|------|---------|-------|---------|---------|----|
| 1  | 114.1   | 57.5  |         |         | L    | 1,492.9 | 746.9 | 1,475.9 | 1,474.9 | 14 |
| 2  | 242.2   | 121.6 | 225.2   |         | K    | 1,379.8 | 690.4 | 1,362.8 | 1,361.8 | 13 |
| 3  | 299.2   | 150.1 | 282.2   |         | G    | 1,251.7 | 626.4 | 1,234.7 | 1,233.7 | 12 |
| 4  | 386.2   | 193.6 | 369.2   | 368.2   | S    | 1,194.7 | 597.8 | 1,177.7 | 1,176.7 | 11 |
| 5  | 443.3   | 222.1 | 426.2   | 425.3   | G    | 1,107.7 | 554.3 | 1,090.6 | 1,089.6 | 10 |
| 6  | 557.3   | 279.2 | 540.3   | 539.3   | N    | 1,050.6 | 525.8 | 1,033.6 | 1,032.6 | 9  |
| 7  | 670.4   | 335.7 | 653.4   | 652.4   | L    | 936.6   | 468.8 | 919.6   | 918.6   | 8  |
| 8  | 799.4   | 400.2 | 782.4   | 781.4   | E    | 823.5   | 412.3 | 806.5   | 805.5   | 7  |
| 9  | 870.5   | 435.7 | 853.4   | 852.5   | A    | 694.5   | 347.7 | 677.4   |         | 6  |
| 10 | 983.6   | 492.3 | 966.5   | 965.5   | I    | 623.4   | 312.2 | 606.4   |         | 5  |
| 11 | 1,120.6 | 560.8 | 1,103.6 | 1,102.6 | H    | 510.3   | 255.7 | 493.3   |         | 4  |
| 12 | 1,219.7 | 610.3 | 1,202.7 | 1,201.7 | V    | 373.3   | 187.1 | 356.3   |         | 3  |
| 13 | 1,332.8 | 666.9 | 1,315.7 | 1,314.8 | I    | 274.2   | 137.6 | 257.2   |         | 2  |
| 14 | 1,492.9 | 746.9 | 1,475.9 | 1,474.9 | K+14 | 161.1   | 81.1  | 144.1   |         | 1  |



**Supplemental Figure 6:**

**A**

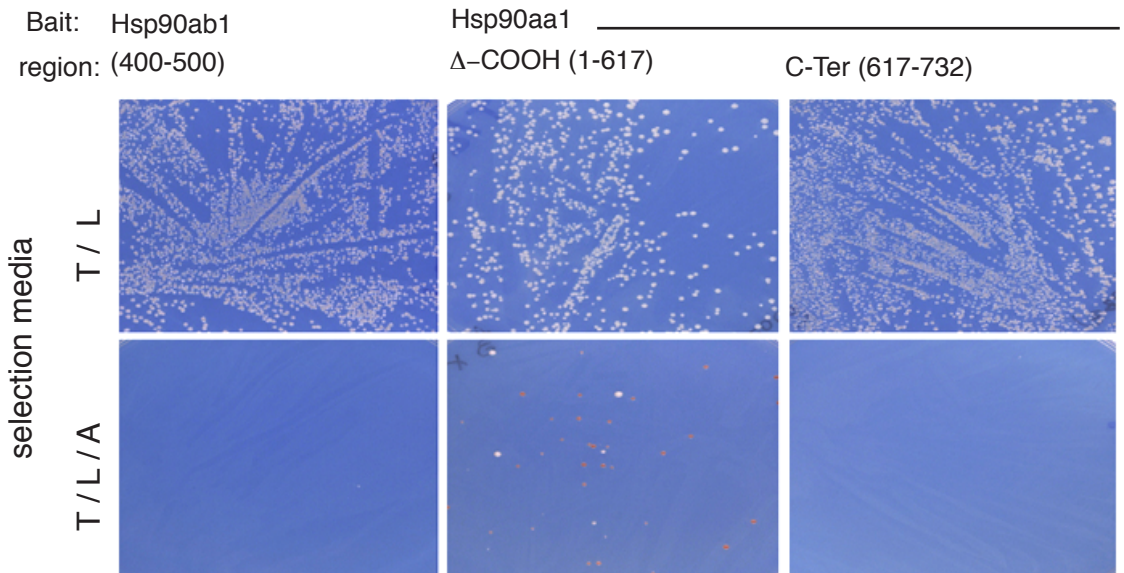

Prey: Kdm6a alternative isoform 2

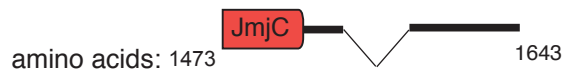

**B**

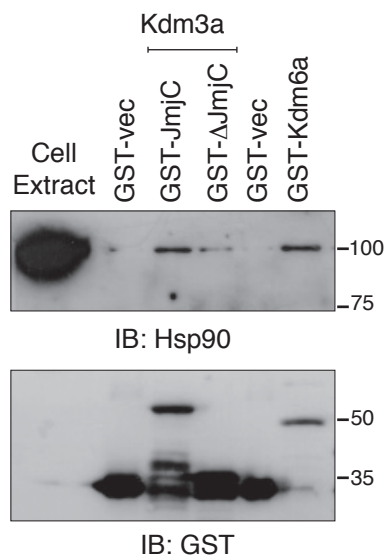

Supplement: supp_E13-08-0471v1_CombinedSupMats.pdf [file supp_E13-08-0471v1_CombinedSupMats.pdf]
